# Supplementary material for: Tetrafluoroethylene-Propylene Elastomer for Fabrication of Microfluidic Organs-on-Chips Resistant to Drug Absorption
Source: MDPI journal article supplement (doi:10.3390/mi10110793), 2019-11-19
Supplement: s1 [file s1]

## Supporting Information

# Tetrafluoroethylene-Propylene Elastomer for Fabrication of Microfluidic Organs-on-Chips Resistant to Drug Absorption

Emi Sano <sup>1,†</sup>, Chihiro Mori <sup>1,†</sup>, Naoki Matsuoka <sup>2</sup>, Yuka Ozaki <sup>1</sup>, Keisuke Yagi <sup>2</sup>, Aya Wada <sup>2</sup>, Koichi Tashima <sup>2</sup>, Shinsuke Yamasaki <sup>2</sup>, Kana Tanabe <sup>2</sup>, Kayo Yano <sup>1</sup> and Yu-suke Torisawa <sup>1,3,\*</sup>

<sup>1</sup> Department of Micro Engineering, Kyoto University, Kyoto 615-8540, Japan; e.sano1017@gmail.com (E.S.); mori.chihiro.5u@kyoto-u.ac.jp (C.M.); ozaki.yuka.6z@kyoto-u.ac.jp (Y.O.); yano.kayo.7z@kyoto-u.ac.jp (K.Y.)

<sup>2</sup> AGC Inc, Tokyo 100-8405, Japan; naoki-matsuoka@agc.com (N.M.); keisuke-yagi@agc.com (K.Y.); aya-wada@agc.com (A.W.); kouichi-tashima@agc.com (K.T.); shinsuke.yamasaki@agc.com (S.Y.); kana-tanabe@agc.com (K.T.)

<sup>3</sup> Hakubi Center for Advanced Research, Kyoto University, Kyoto 615-8540, Japan

\* Correspondence: torisawa.yusuke.6z@kyoto-u.ac.jp; Tel.: +81-75-383-3701

† These authors contributed equally to this work.

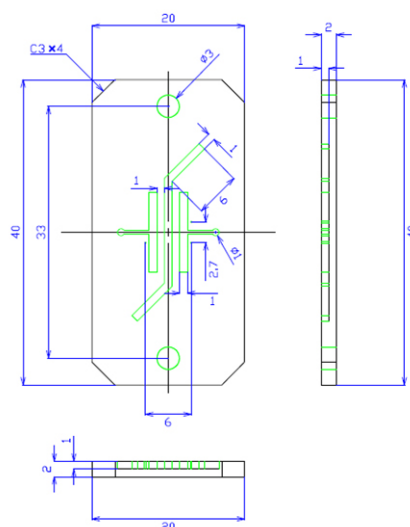

**Supplementary Fig. S1.** Design of the FEPM channel layer. All dimensions in millimeters.

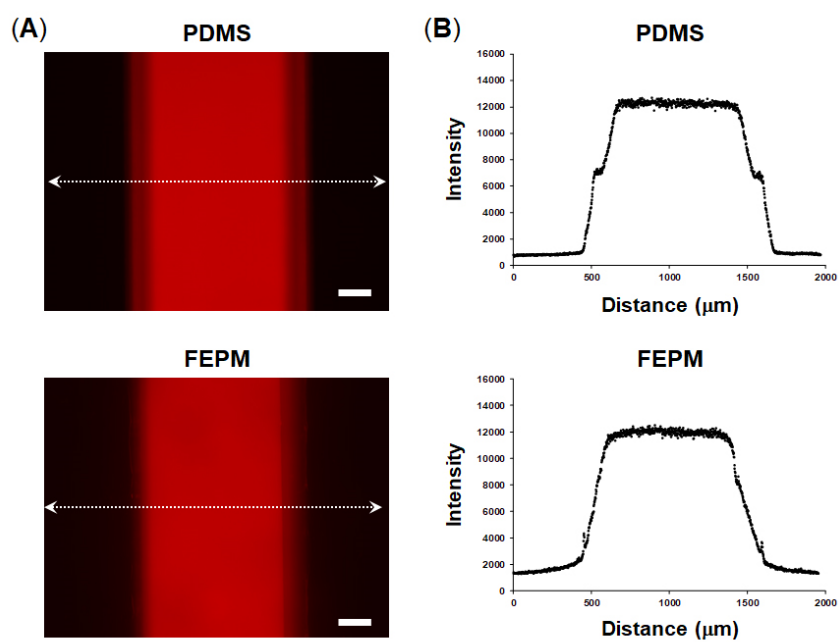

**Supplementary Fig. S2.** (A) Fluorescence images of a solution containing 10  $\mu\text{M}$  Rhodamine B inside PDMS and FEPM channels with an exposure time of 5 ms. Scale bars, 200  $\mu\text{m}$ . (B) Line profiles of the fluorescence images shown in (A) (indicated by white dotted lines). (n=3)

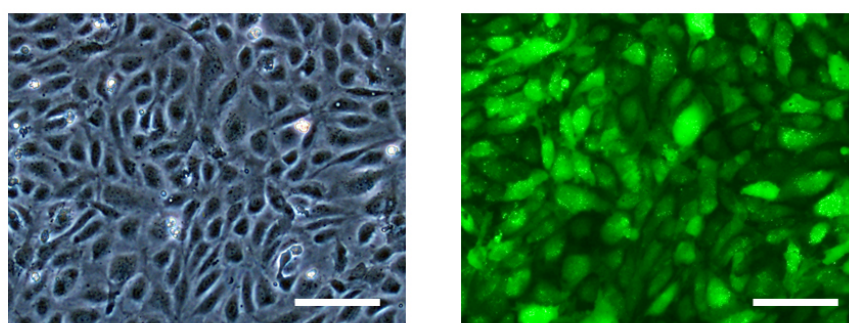

**Supplementary Fig. S3.** Optical (left) and fluorescence (right) images of GFP-expressing HUVECs cultured on a cell culture plate for 7 days. (n=3) Scale bars, 100  $\mu\text{m}$ .

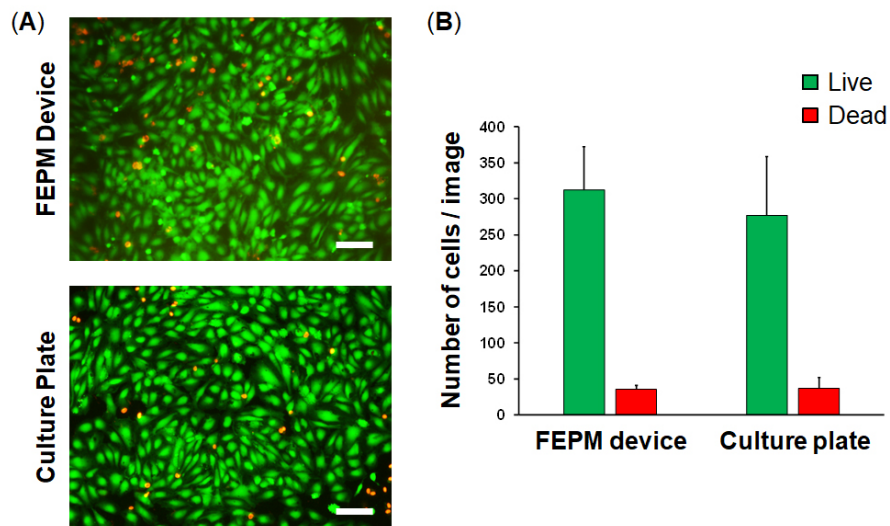

**Supplementary Fig. S4.** Cellular viability after 24 hours treatment of mitomycin C. (A) Fluorescence images of lived/dead strained HUVECs in the FEPM device and in a 96-well culture plate 24 hours after incubation with mitomycin C ( $10 \mu\text{g mL}^{-1}$ ). Scale bars,  $100 \mu\text{m}$ . (B) The average number of live and dead cells in each image area (ca.  $0.58 \text{ mm}^2$ ) evaluated using 3 different observation areas from 3 independent experiments.

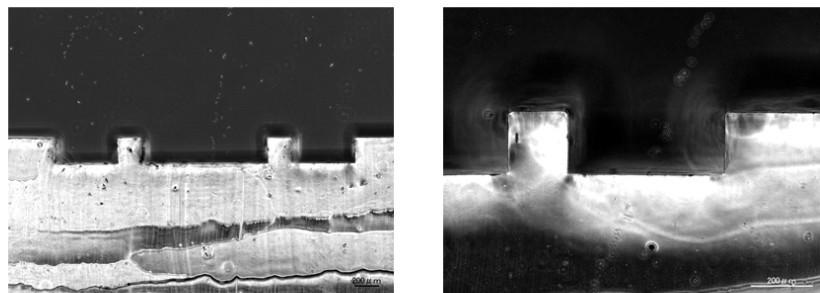

**Supplementary Fig. S5.** Cross-sectional images of FEPM layers consisting of small channels. The cross-sectional sizes of the channels are  $1 \text{ mm}$  (width)  $\times$   $200 \mu\text{m}$  (height) for the central channel and  $500 \mu\text{m}$  (width)  $\times$   $200 \mu\text{m}$  (height) for the side channels. The gaps between the microchannels are  $100 \mu\text{m}$ . Scale bars,  $200 \mu\text{m}$ .
